# Supplementary material for: Step-by-step analysis of drinking water treatment trains using size-exclusion chromatography to fingerprint and track protein-like and humic/fulvic-like fractions of dissolved organic matter
Source: Royal Society of Chemistry journal article supplement (doi:10.1039/c9ew00340a), 2019-01-01
Supplement: c9ew00340a1.pdf [file c9ew00340a1.pdf]

## Supplementary information

### Step-by-step analysis of drinking water treatment trains using size-exclusion chromatography to fingerprint and track protein-like and humic/fulvic-like fractions of dissolved organic matter

Alexey Ignatev, Tuula Tuhkanen

Department of Biological and Environmental Science, University of Jyväskylä

PO Box 35, FI-40014, Jyväskylä, Finland

[alexey.n.ignatev@jyu.fi](mailto:alexey.n.ignatev@jyu.fi), [alexignat@gmail.com](mailto:alexignat@gmail.com) (A. Ignatev)

[tuula.a.tuhkanen@jyu.fi](mailto:tuula.a.tuhkanen@jyu.fi) (T. Tuhkanen)

## Table of contents

|                  |    |
|------------------|----|
| Fig. S1 .....    | 3  |
| Fig. S2 .....    | 4  |
| Fig. S3 .....    | 5  |
| Fig. S4 .....    | 6  |
| Fig. S5 .....    | 7  |
| Fig. S6 .....    | 8  |
| Fig. S7 .....    | 9  |
| Fig. S8 .....    | 10 |
| Fig. S9 .....    | 11 |
| Table S1.....    | 12 |
| Table S2.....    | 13 |
| Table S3.....    | 14 |
| Table S4.....    | 15 |
| Table S5a-c..... | 16 |
| Table S6a-c..... | 17 |

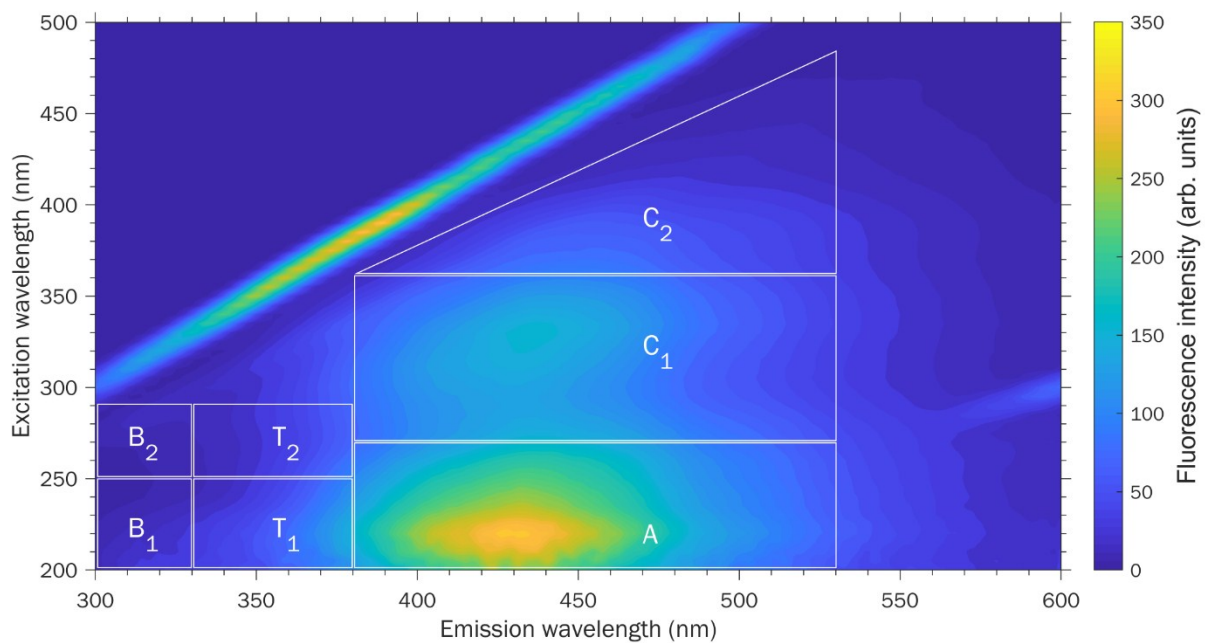

**Fig. S1.** Typical EEM fluorescence spectrum of a raw water (sampled from lake Päijänne, Finland, on 10.07.2018). Regions corresponding to tyrosine-like (B<sub>1</sub>, B<sub>2</sub>), tryptophan-like (T<sub>1</sub>, T<sub>2</sub>) and humic/fulvic-like (A, C<sub>1</sub>, C<sub>2</sub>) fluorescence are indicated with white triangles.

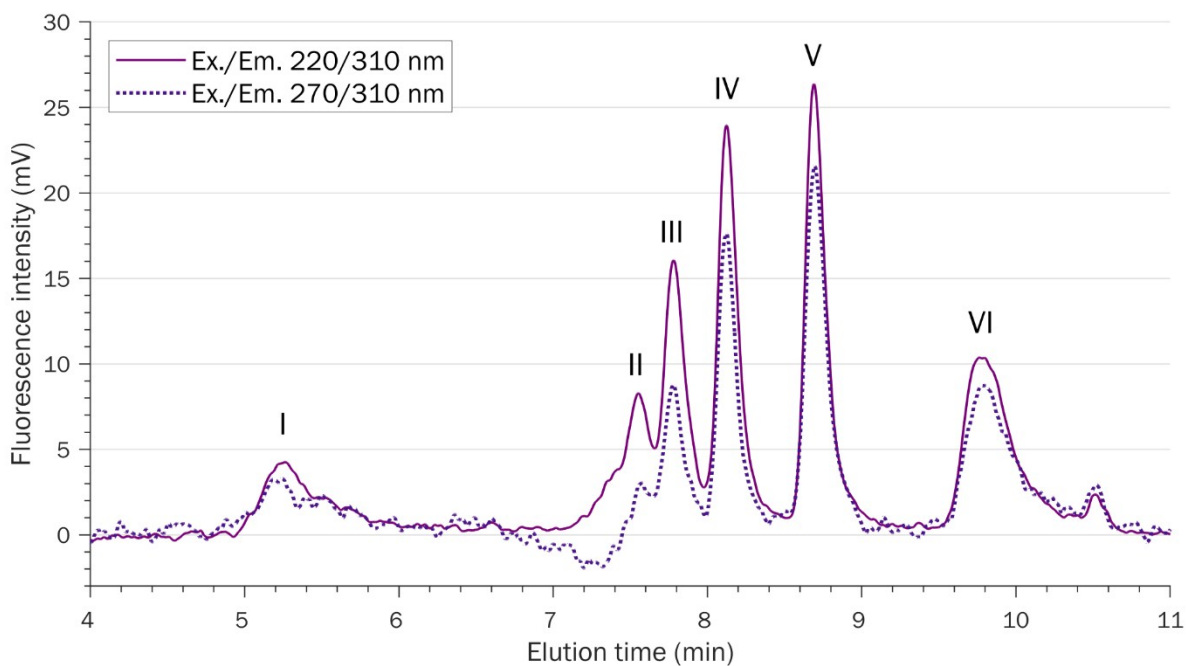

**Fig. S2.** Comparison of HPSEC chromatograms demonstrating influence of excitation wavelength on intensity of tyrosine-like fluorescence (emission at 310 nm) of a raw water (sampled from lake Konnevesi, Finland, on 14.03.2017). Overlapping with Raman scatter peak of water led to higher noise of fluorescence signal at 270/310 nm compared to 220/310 nm (note degraded peak II).

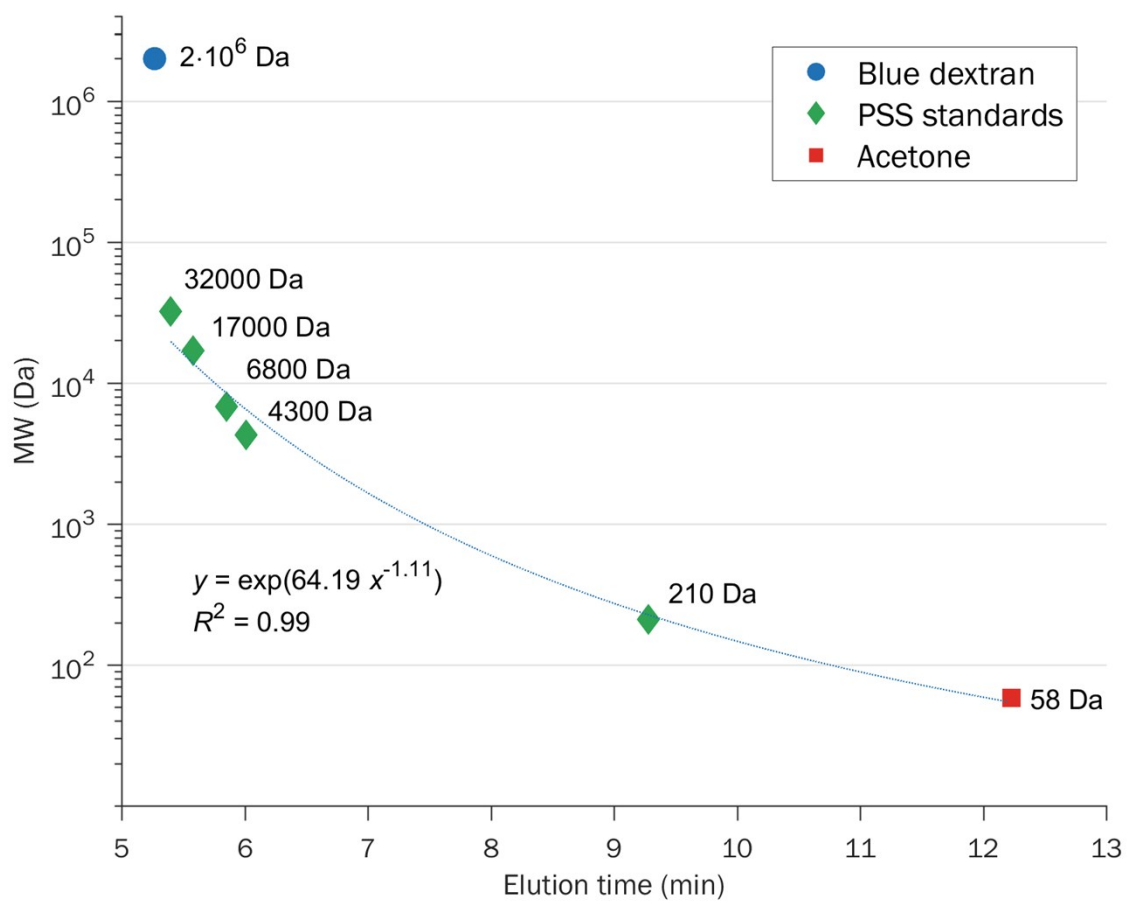

**Fig. S3.** Calibration of the size-exclusion column using acetone, polystyrene sulphonate (PSS) standards, and blue dextran. The fitting equation was used to calculate apparent MW of DOM fractions and estimate  $M_w$  and  $M_N$ .

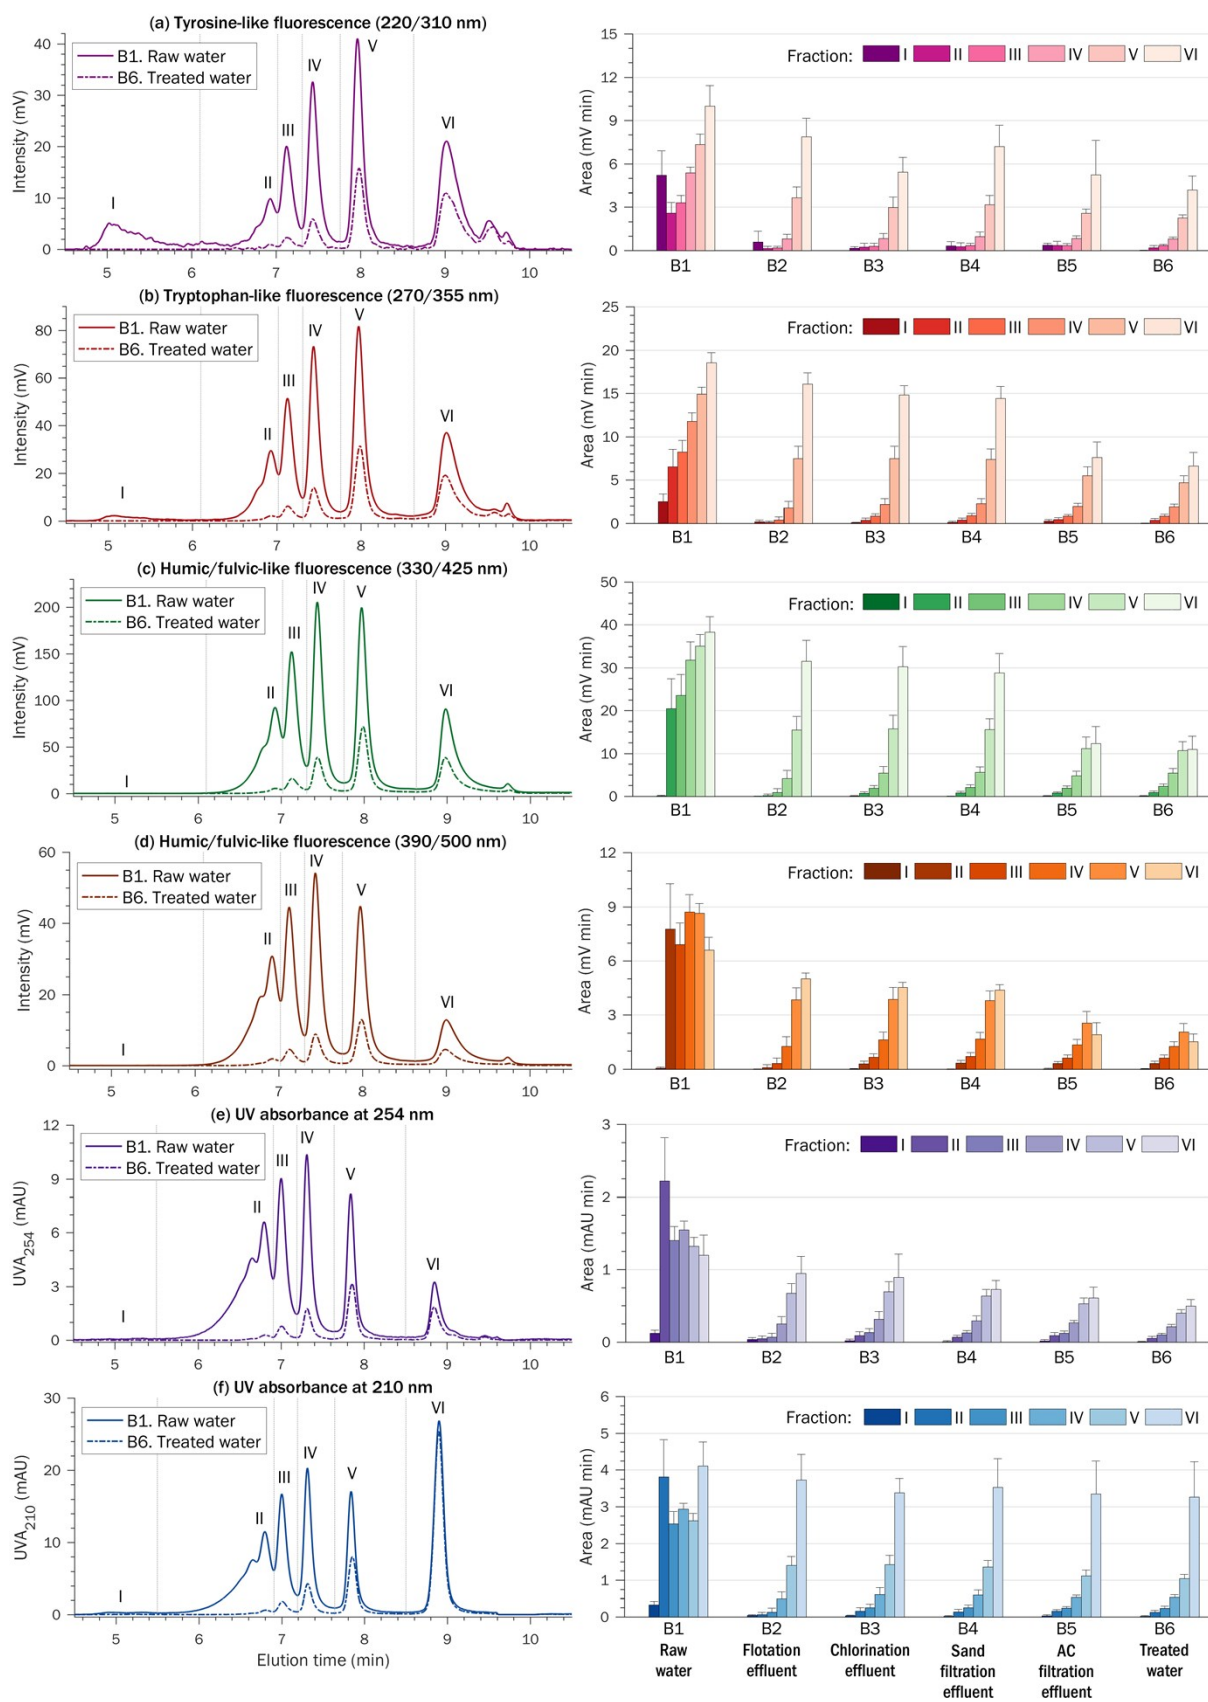

**Fig. S4.** Characterization of DOM at DWTP B. Left column: superimposed HPSEC chromatograms of raw water and treated water with (a)-(d) fluorescence and (e)-(f) UV detection. Right column: evolution of DOM fractions I-VI along the water treatment train (mean area  $\pm$  SD,  $n = 4$ ).

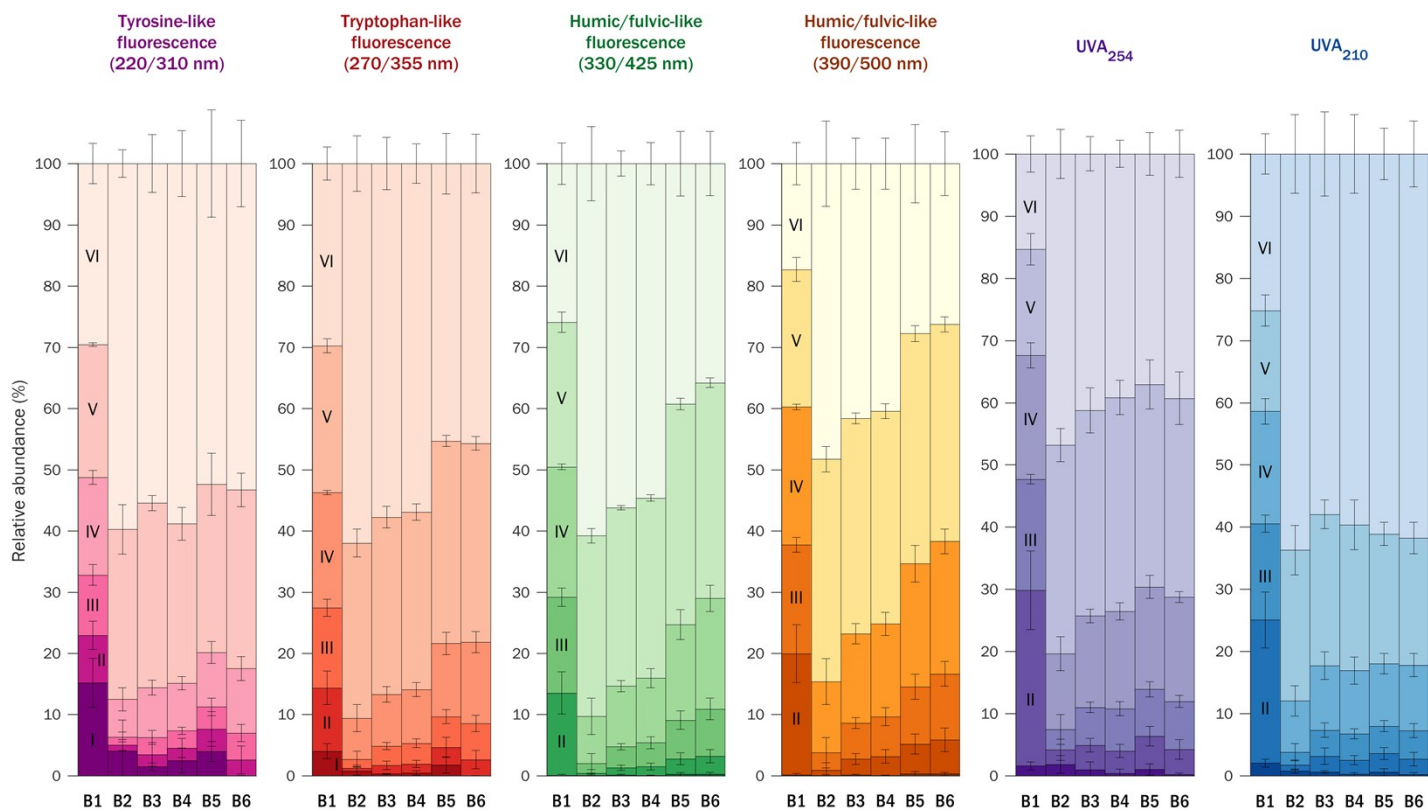

**Fig. S5.** Relative abundance of fluorescing and UV absorbing DOM fractions I-VI in raw water (B1), process water (B2-B5), and treated water (B6) at DWTP B (mean  $\pm$  SD,  $n = 4$ ). Locations of sampling points B1-B6 are shown in Fig. 1.

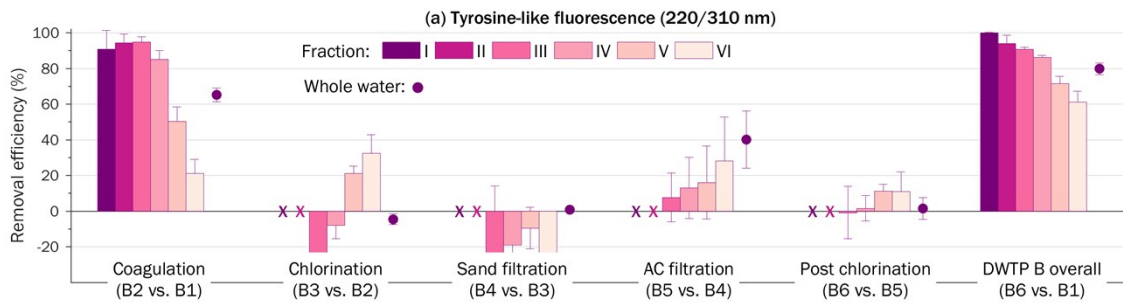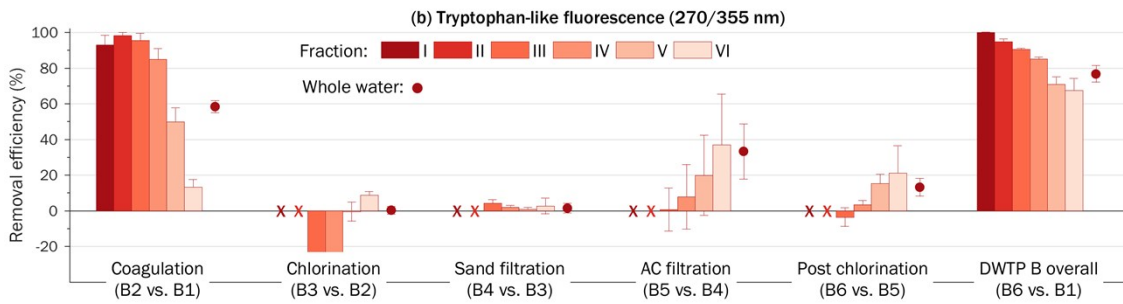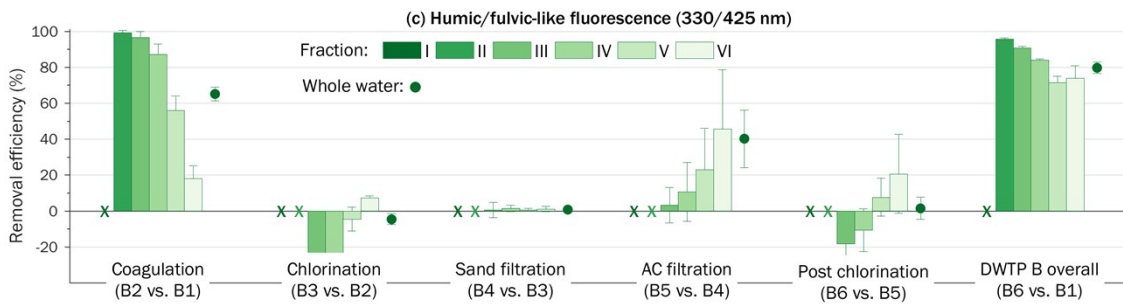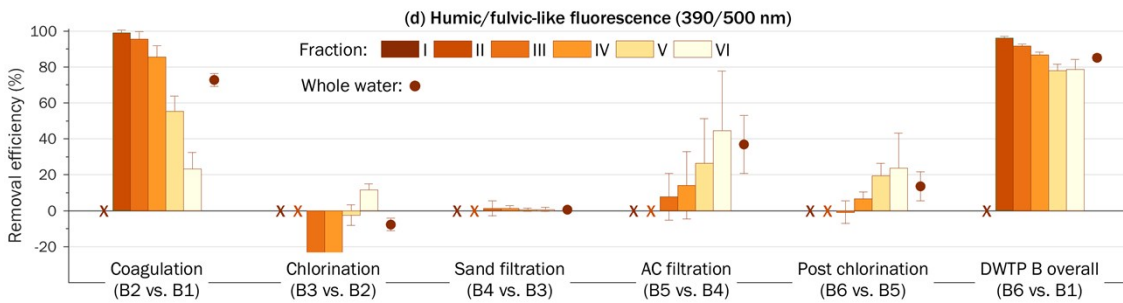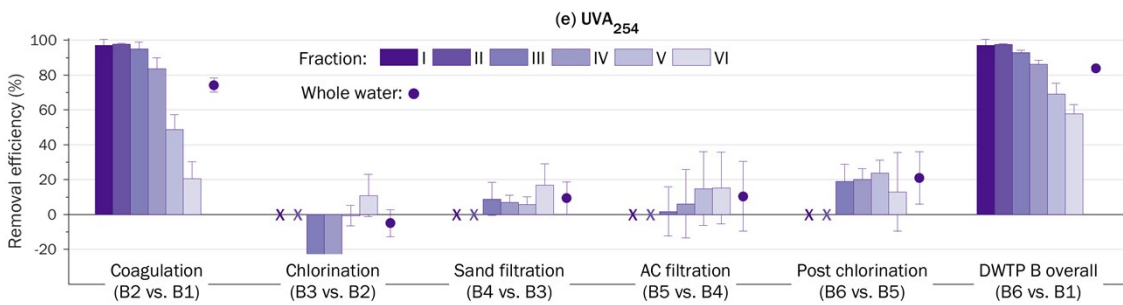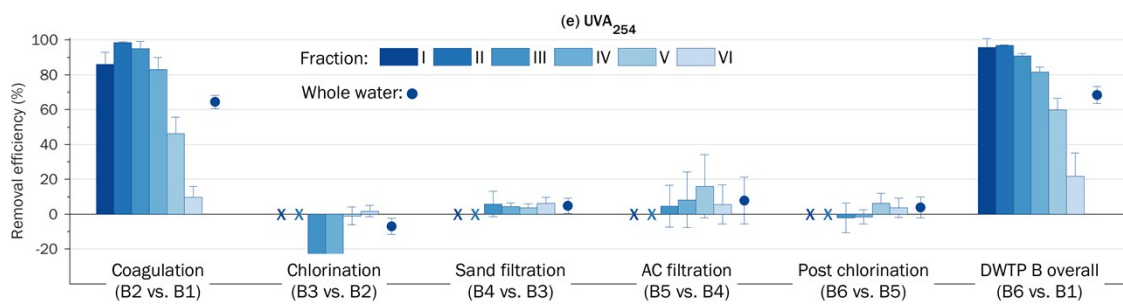



**Fig. S6.** Step-by-step, fraction-by-fraction, and overall efficiency of DWTP B (mean  $\pm$  SD,  $n = 4$ ). Absent or removed fractions are denoted with ‘X’. Negative removal efficiencies indicate formation of DOM (during chlorination)

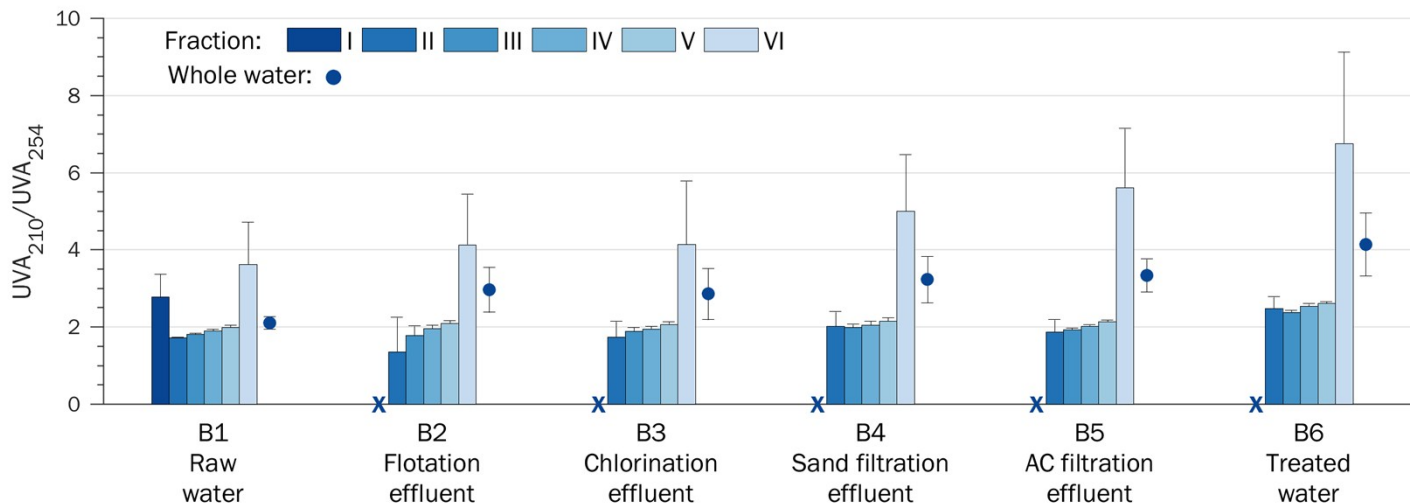

**Fig. S7.** Ratio  $UVA_{210}/UVA_{254}$  of DOM fractions and whole water samples from DWTP B (mean  $\pm$  SD,  $n = 4$ ). Lower values indicate higher aromatic character. Removed in the coagulation/flocculation high MW fraction I is denoted with “X”.

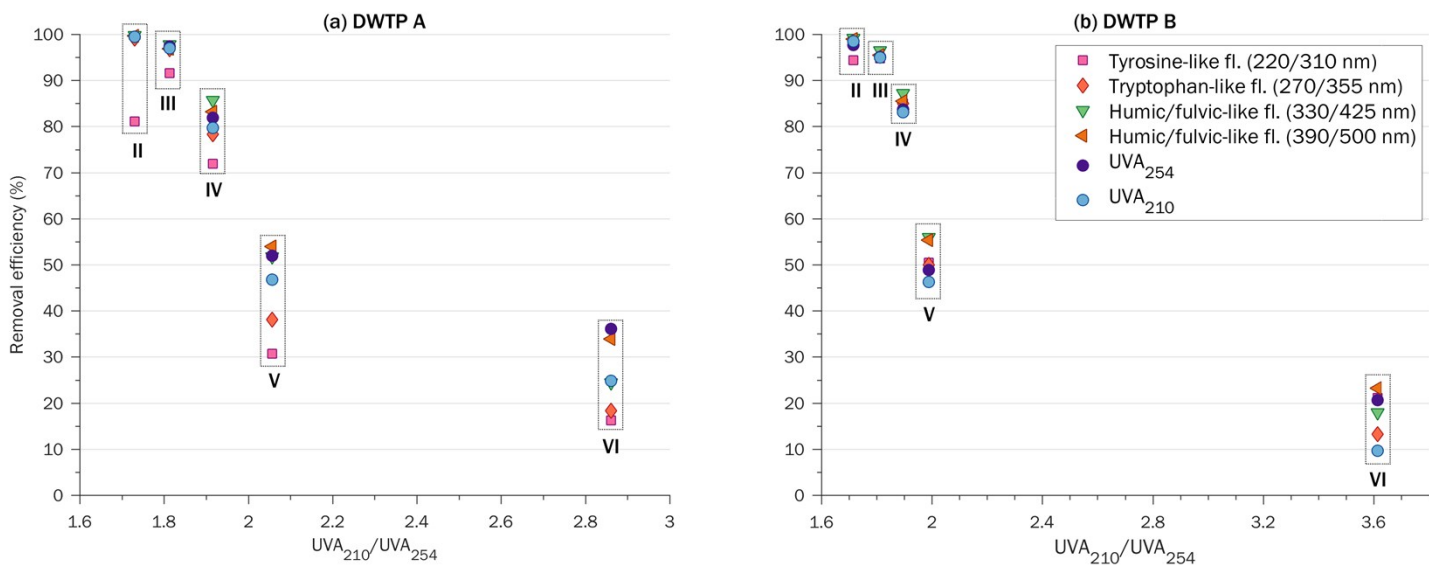

**Fig. S8.** Correlation between removal efficiencies by coagulation and ratio  $UVA_{210}/UVA_{254}$  of DOM fractions II-VI for (a) DWTP A and (b) DWTP B.

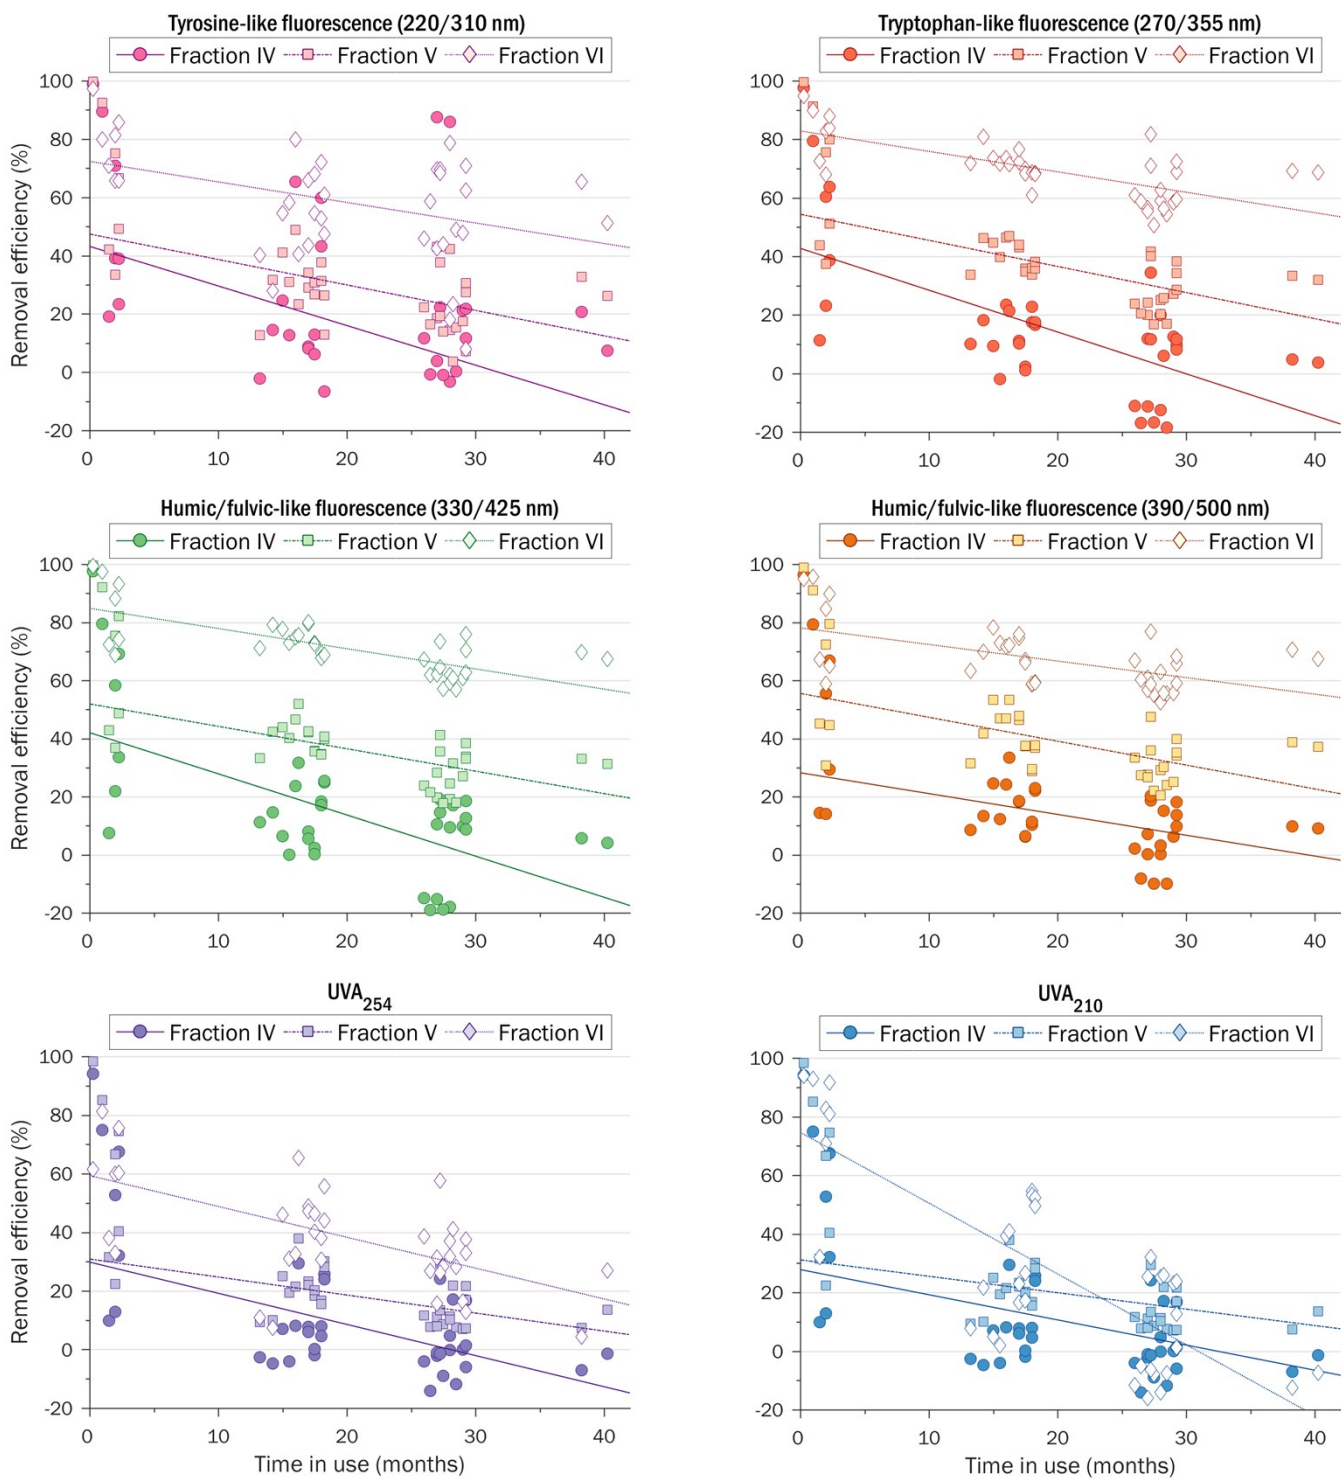

**Fig. S9.** Decline of AC filtration efficiency at DWTP A over time in regards to removal of fluorescing and UV absorbing DOM fractions IV-VI. Each point represents a single sample of AC filtration effluent collected from one of the eight parallel AC tanks. The linear trend lines were calculated using robust regression (MATLAB *robustfit*, bisquare weight function),  $\rho$  is Pearson correlation coefficient ( $n = 38$ ).

**Table S1.** Main parameters of the HPSEC-UV-fluorescence method.

|                                           |                                                                                                                                |
|-------------------------------------------|--------------------------------------------------------------------------------------------------------------------------------|
| Eluent flow rate                          | 1 mL min <sup>-1</sup>                                                                                                         |
| Injection volume                          | 50 $\mu$ L                                                                                                                     |
| Autosampler temperature                   | 4 $^{\circ}$ C                                                                                                                 |
| Column oven temperature                   | 25 $^{\circ}$ C                                                                                                                |
| Elution time                              | 30 min                                                                                                                         |
| <i>PDA detector</i>                       |                                                                                                                                |
| Wavelength range                          | 200-400 nm                                                                                                                     |
| Cell temperature                          | 40 $^{\circ}$ C                                                                                                                |
| Slit width                                | 1.2 nm                                                                                                                         |
| Data acquisition rate                     | 4.17 Hz                                                                                                                        |
| <i>Fluorescence detector</i>              |                                                                                                                                |
| $\lambda_{\text{ex}}/\lambda_{\text{em}}$ | 220/310 nm (tyrosine-like)<br>270/355 nm (tryptophan-like)<br>330/425 nm (humic/fulvic-like)<br>390/500 nm (humic/fulvic-like) |
| Cell temperature                          | 25 $^{\circ}$ C                                                                                                                |
| Sensitivity                               | High                                                                                                                           |
| Gain                                      | 1 $\times$                                                                                                                     |
| Data acquisition rate                     | 5.00 Hz                                                                                                                        |

**Table S2.** Water quality parameters at DWTP A in 2017 (*n* is the total number of analyses of raw and treated waters).\*

|                                          | Raw water (A1) |             |             | Treated water (A7) |       |       | <i>n</i><br>(raw/treated) |
|------------------------------------------|----------------|-------------|-------------|--------------------|-------|-------|---------------------------|
|                                          | Mean           | Min         | Max         | Mean               | Min   | Max   |                           |
| Temperature (°C)                         | <b>10.3</b>    | 2.2         | 18.3        | <b>10.2</b>        | 3.6   | 15.0  | 51/24                     |
| pH                                       | <b>7.3</b>     | 7.8         | 7.0         | <b>8.4</b>         | 8.1   | 9.0   | 51/111                    |
| Alkalinity (mmol L <sup>-1</sup> )       | <b>0.46</b>    | 0.41        | 0.49        | <b>0.63</b>        | 0.56  | 0.72  | 12/12                     |
| Hardness (mmol L <sup>-1</sup> )         | <b>0.22</b>    | 0.22        | 0.22        | <b>0.40</b>        | 0.39  | 0.42  | 12/12                     |
| Turbidity (FNU)                          | <b>2.2</b>     | 1.4         | 3.8         | <b>0.09</b>        | 0.05  | 0.11  | 51/84                     |
| Conductivity (mS/m)                      | <b>7.1</b>     | 6.3         | 10.9        | <b>12.1</b>        | 11.7  | 14.3  | 51/75                     |
| TOC (mg L <sup>-1</sup> )                | <b>6.8</b>     | 6.3         | 7.7         | <b>1.8</b>         | 1.6   | 2.5   | 12/12                     |
| NH <sub>4</sub> -N (µg L <sup>-1</sup> ) | <i>n.d.</i>    | <i>n.d.</i> | <i>n.d.</i> | <b>0.11</b>        | 0.08  | 0.14  | 0/12                      |
| Cl <sub>2</sub> (mg L <sup>-1</sup> )    | <i>n.d.</i>    | <i>n.d.</i> | <i>n.d.</i> | <b>0.34</b>        | 0.19  | 0.41  | 0/120                     |
| Al (mg L <sup>-1</sup> )                 | <b>0.00</b>    | 0.00        | 0.00        | <b>0.02</b>        | 0.00  | 0.06  | 3/48                      |
| Fe (mg L <sup>-1</sup> ) <sup>†</sup>    | <b>0.197</b>   | 0.197       | 0.197       | <b>0.005</b>       | 0.000 | 0.023 | 3/24                      |
| Mn (mg L <sup>-1</sup> ) <sup>‡</sup>    | <b>0.085</b>   | 0.085       | 0.085       | <b>0.003</b>       | 0.000 | 0.009 | 3/24                      |

\* The data were provided by DWTP A.

† In 2018, the concentration of Fe was 0.158 mg L<sup>-1</sup>.‡ In 2018, the concentration of Mn was 0.176 mg L<sup>-1</sup>.

**Table S3.** Water quality parameters measured at DWTP B in 2017 (*n* is the total number of analyses of raw and treated waters).\*

|                                          | Raw water (B1)   |             |             | Treated water (B6) |        |        | <i>n</i><br>(raw/treated) |
|------------------------------------------|------------------|-------------|-------------|--------------------|--------|--------|---------------------------|
|                                          | Mean             | Min         | Max         | Mean               | Min    | Max    |                           |
| Temperature (°C)                         | <b>7.8</b>       | 0.5         | 18.7        | <b>8.0</b>         | 0.8    | 19.0   | 249/249                   |
| pH                                       | <b>7.2</b>       | 6.9         | 7.7         | <b>8.2</b>         | 7.9    | 8.5    | 248/249                   |
| Alkalinity (mmol L <sup>-1</sup> )       | <b>0.28</b>      | 0.26        | 0.29        | <b>0.69</b>        | 0.61   | 0.76   | 54/249                    |
| Hardness (°dH)                           | <b>1.1</b>       | 1.0         | 1.2         | <b>3.4</b>         | 3.2    | 3.6    | 52/52                     |
| Hardness (mmol L <sup>-1</sup> )         | <b>0.20</b>      | 0.18        | 0.21        | <b>0.61</b>        | 0.57   | 0.64   | 52/52                     |
| Turbidity (NTU)                          | <b>2.1</b>       | 0.27        | 11          | <b>0.05</b>        | 0.03   | 0.09   | 249/249                   |
| Conductivity (mS/m)                      | <b>6.3</b>       | 6.1         | 6.5         | <b>15.1</b>        | 14.7   | 15.5   | 51/51                     |
| UVA <sub>254</sub> (AU)                  | <b>0.139</b>     | 0.128       | 0.159       | <b>0.024</b>       | 0.013  | 0.30   | 22/20                     |
| TOC (mg L <sup>-1</sup> )                | <b>6.1</b>       | 5.8         | 6.3         | <b>2.2</b>         | 1.6    | 2.7    | 51/248                    |
| Total N (µg L <sup>-1</sup> )            | <b>350</b>       | 310         | 380         | <b>170</b>         | 110    | 220    | 6/6                       |
| NH <sub>4</sub> -N (µg L <sup>-1</sup> ) | <b>7</b>         | 2           | 15          | <b>2</b>           | 2      | 3      | 7/7                       |
| NO <sub>3</sub> -N (mg L <sup>-1</sup> ) | <b>&lt; 0.10</b> | < 0.10      | < 0.10      | <b>&lt; 0.10</b>   | < 0.10 | < 0.10 | 7/7                       |
| NO <sub>2</sub> -N (mg L <sup>-1</sup> ) | <b>&lt; 1</b>    | < 1         | 1           | <b>&lt; 1</b>      | < 1    | < 1    | 7/7                       |
| Total P (µg L <sup>-1</sup> )            | <b>14</b>        | 10          | 18          | <b>&lt; 3</b>      | < 2    | 6      | 8/8                       |
| Cl <sub>2</sub> (mg L <sup>-1</sup> )    | <i>n.d.</i>      | <i>n.d.</i> | <i>n.d.</i> | <b>0.44</b>        | 0.38   | 0.50   | 0/249                     |
| Al (mg L <sup>-1</sup> )                 | <b>&lt; 0.03</b> | < 0.02      | 0.07        | <b>&lt; 0.02</b>   | < 0.02 | 0.03   | 7/8                       |
| Fe (mg L <sup>-1</sup> )                 | <b>&lt; 0.10</b> | < 0.02      | 0.25        | <b>&lt; 0.02</b>   | < 0.02 | < 0.02 | 52/248                    |
| Mn (mg L <sup>-1</sup> )                 | <b>&lt; 0.03</b> | < 0.01      | 0.05        | <b>&lt; 0.01</b>   | < 0.01 | < 0.01 | 7/48                      |

\* The data are published online at

[https://www.tampere.fi/material/attachments/vesi/vesi/bOKLI2SYI/Ruskon\\_kayttotarkkailu\\_2017.pdf](https://www.tampere.fi/material/attachments/vesi/vesi/bOKLI2SYI/Ruskon_kayttotarkkailu_2017.pdf)

**Table S4.** Characteristics of whole water at different steps of DWTP B (mean  $\pm$  SD,  $n = 4$ ).

|                                            | B1               | B2                 | B3                    | B4                       | B5                     | B6             |
|--------------------------------------------|------------------|--------------------|-----------------------|--------------------------|------------------------|----------------|
|                                            | Raw water        | Flotation effluent | Chlorination effluent | Sand filtration effluent | AC filtration effluent | Treated water  |
| DOC (mg L <sup>-1</sup> )                  | 6.3 $\pm$ 0.5    | 2.7 $\pm$ 0.2      | 2.7 $\pm$ 0.1         | 2.7 $\pm$ 0.2            | 2.3 $\pm$ 0.3          | 2.3 $\pm$ 0.2  |
| SUVA (L mg <sup>-1</sup> m <sup>-1</sup> ) | 2.5 $\pm$ 0.3    | 1.5 $\pm$ 0.4      | 1.6 $\pm$ 0.5         | 1.4 $\pm$ 0.2            | 1.4 $\pm$ 0.3          | 1.1 $\pm$ 0.2  |
| UVA <sub>210</sub> /UVA <sub>254</sub>     | 2.1 $\pm$ 0.2    | 2.9 $\pm$ 0.6      | 2.8 $\pm$ 0.5         | 2.9 $\pm$ 0.5            | 3.5 $\pm$ 0.5          | 4.1 $\pm$ 0.6  |
| Total UV absorbance (mAU min)              |                  |                    |                       |                          |                        |                |
| 254 nm                                     | 7.8 $\pm$ 0.8    | 2.0 $\pm$ 0.5      | 2.1 $\pm$ 0.7         | 1.9 $\pm$ 0.3            | 1.6 $\pm$ 0.3          | 1.3 $\pm$ 0.2  |
| 210 nm                                     | 16.3 $\pm$ 1.4   | 5.9 $\pm$ 1.0      | 5.9 $\pm$ 0.7         | 5.9 $\pm$ 0.9            | 5.4 $\pm$ 1.1          | 5.2 $\pm$ 1.1  |
| Total fluorescence (mV min)                |                  |                    |                       |                          |                        |                |
| Tyrosine-like (220/310 nm)                 | 33.8 $\pm$ 3.1   | 13.2 $\pm$ 2.5     | 9.9 $\pm$ 2.6         | 12.3 $\pm$ 2.6           | 9.7 $\pm$ 2.9          | 7.8 $\pm$ 1.0  |
| Tryptophan-like (270/355 nm)               | 62.5 $\pm$ 5.4   | 26.1 $\pm$ 3.3     | 25.8 $\pm$ 3.5        | 25.5 $\pm$ 3.5           | 16.7 $\pm$ 2.7         | 14.5 $\pm$ 2.5 |
| Humic/fulvic-like (330/425 nm)             | 149.3 $\pm$ 19.1 | 52.2 $\pm$ 8.9     | 54.0 $\pm$ 10.1       | 52.8 $\pm$ 8.3           | 31.1 $\pm$ 7.6         | 30.3 $\pm$ 6.1 |
| Humic/fulvic-like (390/500 nm)             | 38.7 $\pm$ 4.4   | 10.6 $\pm$ 1.5     | 11.0 $\pm$ 1.7        | 10.9 $\pm$ 1.3           | 6.8 $\pm$ 1.6          | 5.8 $\pm$ 1.2  |

**Table S5a.** Number average MW DWTP A (mean  $\pm$  SD,  $n = 3$ ).

|                                | A1<br>Raw water | A2<br>Ozonation<br>effluent | A3<br>Flotation<br>effluent | A4<br>Sand<br>filtration<br>effluent | A5<br>Chlorination<br>effluent | A6<br>AC<br>filtration<br>effluent | A7<br>Treated water |
|--------------------------------|-----------------|-----------------------------|-----------------------------|--------------------------------------|--------------------------------|------------------------------------|---------------------|
| UV detection                   |                 |                             |                             |                                      |                                |                                    |                     |
| 254 nm                         | 803 $\pm$ 99    | 788 $\pm$ 49                | 460 $\pm$ 60                | 395 $\pm$ 71                         | 411 $\pm$ 64                   | 428 $\pm$ 37                       | 467 $\pm$ 42        |
| 210 nm                         | 789 $\pm$ 60    | 735 $\pm$ 46                | 411 $\pm$ 31                | 386 $\pm$ 25                         | 386 $\pm$ 18                   | 380 $\pm$ 13                       | 371 $\pm$ 13        |
| Fluorescence detection         |                 |                             |                             |                                      |                                |                                    |                     |
| Tyrosine-like (220/310 nm)     | 433 $\pm$ 32    | 442 $\pm$ 42                | 327 $\pm$ 36                | 318 $\pm$ 34                         | 316 $\pm$ 38                   | 349 $\pm$ 45                       | 342 $\pm$ 39        |
| Tryptophan-like (270/355 nm)   | 474 $\pm$ 46    | 497 $\pm$ 46                | 329 $\pm$ 36                | 317 $\pm$ 35                         | 317 $\pm$ 38                   | 381 $\pm$ 42                       | 373 $\pm$ 42        |
| Humic/fulvic-like (330/425 nm) | 513 $\pm$ 58    | 576 $\pm$ 56                | 336 $\pm$ 39                | 326 $\pm$ 39                         | 332 $\pm$ 40                   | 412 $\pm$ 43                       | 406 $\pm$ 44        |
| Humic/fulvic-like (390/500 nm) | 605 $\pm$ 58    | 657 $\pm$ 60                | 375 $\pm$ 45                | 359 $\pm$ 42                         | 367 $\pm$ 44                   | 442 $\pm$ 46                       | 435 $\pm$ 50        |

**Table S5b.** Weight average MW DWTP A (mean  $\pm$  SD,  $n = 3$ ).

|                                | A1<br>Raw water | A2<br>Ozonation<br>effluent | A3<br>Flotation<br>effluent | A4<br>Sand<br>filtration<br>effluent | A5<br>Chlorination<br>effluent | A6<br>AC<br>filtration<br>effluent | A7<br>Treated water |
|--------------------------------|-----------------|-----------------------------|-----------------------------|--------------------------------------|--------------------------------|------------------------------------|---------------------|
| UV detection                   |                 |                             |                             |                                      |                                |                                    |                     |
| 254 nm                         | 1398 $\pm$ 98   | 1486 $\pm$ 359              | 609 $\pm$ 88                | 567 $\pm$ 60                         | 610 $\pm$ 42                   | 705 $\pm$ 107                      | 653 $\pm$ 29        |
| 210 nm                         | 1378 $\pm$ 104  | 1377 $\pm$ 283              | 573 $\pm$ 44                | 528 $\pm$ 38                         | 576 $\pm$ 29                   | 573 $\pm$ 44                       | 550 $\pm$ 38        |
| Fluorescence detection         |                 |                             |                             |                                      |                                |                                    |                     |
| Tyrosine-like (220/310 nm)     | 925 $\pm$ 143   | 912 $\pm$ 141               | 547 $\pm$ 79                | 500 $\pm$ 48                         | 500 $\pm$ 25                   | 605 $\pm$ 63                       | 509 $\pm$ 43        |
| Tryptophan-like (270/355 nm)   | 850 $\pm$ 37    | 896 $\pm$ 117               | 463 $\pm$ 53                | 435 $\pm$ 29                         | 428 $\pm$ 41                   | 520 $\pm$ 42                       | 522 $\pm$ 37        |
| Humic/fulvic-like (330/425 nm) | 857 $\pm$ 45    | 965 $\pm$ 148               | 463 $\pm$ 51                | 438 $\pm$ 46                         | 451 $\pm$ 45                   | 556 $\pm$ 32                       | 558 $\pm$ 33        |
| Humic/fulvic-like (390/500 nm) | 996 $\pm$ 46    | 1114 $\pm$ 190              | 525 $\pm$ 61                | 494 $\pm$ 46                         | 507 $\pm$ 43                   | 601 $\pm$ 38                       | 603 $\pm$ 33        |

**Table S5c.** Dispersities DWTP A (mean  $\pm$  SD,  $n = 3$ ).

|                                | A1<br>Raw water | A2<br>Ozonation<br>effluent | A3<br>Flotation<br>effluent | A4<br>Sand<br>filtration<br>effluent | A5<br>Chlorination<br>effluent | A6<br>AC<br>filtration<br>effluent | A7<br>Treated water |
|--------------------------------|-----------------|-----------------------------|-----------------------------|--------------------------------------|--------------------------------|------------------------------------|---------------------|
| UV detection                   |                 |                             |                             |                                      |                                |                                    |                     |
| 254 nm                         | 1.76 $\pm$ 0.27 | 1.88 $\pm$ 0.42             | 1.32 $\pm$ 0.03             | 1.45 $\pm$ 0.20                      | 1.50 $\pm$ 0.22                | 1.67 $\pm$ 0.41                    | 1.41 $\pm$ 0.14     |
| 210 nm                         | 1.76 $\pm$ 0.22 | 1.87 $\pm$ 0.29             | 1.39 $\pm$ 0.06             | 1.37 $\pm$ 0.08                      | 1.50 $\pm$ 0.14                | 1.51 $\pm$ 0.16                    | 1.48 $\pm$ 0.14     |
| Fluorescence detection         |                 |                             |                             |                                      |                                |                                    |                     |
| Tyrosine-like (220/310 nm)     | 2.16 $\pm$ 0.44 | 2.08 $\pm$ 0.38             | 1.68 $\pm$ 0.22             | 1.58 $\pm$ 0.22                      | 1.59 $\pm$ 0.13                | 1.76 $\pm$ 0.33                    | 1.49 $\pm$ 0.06     |
| Tryptophan-like (270/355 nm)   | 1.81 $\pm$ 0.20 | 1.81 $\pm$ 0.24             | 1.41 $\pm$ 0.10             | 1.38 $\pm$ 0.06                      | 1.35 $\pm$ 0.03                | 1.37 $\pm$ 0.04                    | 1.40 $\pm$ 0.06     |
| Humic/fulvic-like (330/425 nm) | 1.68 $\pm$ 0.14 | 1.68 $\pm$ 0.21             | 1.38 $\pm$ 0.07             | 1.34 $\pm$ 0.05                      | 1.36 $\pm$ 0.03                | 1.36 $\pm$ 0.06                    | 1.38 $\pm$ 0.07     |
| Humic/fulvic-like (390/500 nm) | 1.66 $\pm$ 0.15 | 1.70 $\pm$ 0.25             | 1.40 $\pm$ 0.07             | 1.38 $\pm$ 0.07                      | 1.38 $\pm$ 0.04                | 1.36 $\pm$ 0.05                    | 1.39 $\pm$ 0.09     |



**Table S6a.** Number average MW DWTP B (mean  $\pm$  SD,  $n = 4$ ).

|                                | B1<br>Raw water | B2<br>Flotation<br>effluent | B3<br>Chlorination<br>effluent | B4<br>Sand filtration<br>effluent | B5<br>AC filtration<br>effluent | B6<br>Treated water |
|--------------------------------|-----------------|-----------------------------|--------------------------------|-----------------------------------|---------------------------------|---------------------|
| UV detection                   |                 |                             |                                |                                   |                                 |                     |
| 254 nm                         | 766 $\pm$ 88    | 384 $\pm$ 34                | 413 $\pm$ 34                   | 415 $\pm$ 34                      | 444 $\pm$ 37                    | 440 $\pm$ 27        |
| 210 nm                         | 593 $\pm$ 44    | 321 $\pm$ 15                | 339 $\pm$ 20                   | 339 $\pm$ 20                      | 333 $\pm$ 21                    | 334 $\pm$ 20        |
| Fluorescence detection         |                 |                             |                                |                                   |                                 |                     |
| Tyrosine-like (220/310 nm)     | 442 $\pm$ 10    | 295 $\pm$ 15                | 314 $\pm$ 16                   | 303 $\pm$ 31                      | 339 $\pm$ 36                    | 332 $\pm$ 22        |
| Tryptophan-like (270/355 nm)   | 460 $\pm$ 5     | 293 $\pm$ 14                | 311 $\pm$ 12                   | 311 $\pm$ 9                       | 355 $\pm$ 32                    | 357 $\pm$ 27        |
| Humic/fulvic-like (330/425 nm) | 506 $\pm$ 20    | 302 $\pm$ 20                | 320 $\pm$ 10                   | 326 $\pm$ 13                      | 379 $\pm$ 27                    | 398 $\pm$ 26        |
| Humic/fulvic-like (390/500 nm) | 586 $\pm$ 23    | 331 $\pm$ 27                | 361 $\pm$ 13                   | 368 $\pm$ 16                      | 436 $\pm$ 37                    | 449 $\pm$ 31        |

**Table S6b.** Weight average MW DWTP B (mean  $\pm$  SD,  $n = 4$ ).

|                                | B1<br>Raw water | B2<br>Flotation<br>effluent | B3<br>Chlorination<br>effluent | B4<br>Sand filtration<br>effluent | B5<br>AC filtration<br>effluent | B6<br>Treated water |
|--------------------------------|-----------------|-----------------------------|--------------------------------|-----------------------------------|---------------------------------|---------------------|
| UV detection                   |                 |                             |                                |                                   |                                 |                     |
| 254 nm                         | 1348 $\pm$ 82   | 598 $\pm$ 95                | 655 $\pm$ 71                   | 662 $\pm$ 36                      | 692 $\pm$ 64                    | 679 $\pm$ 37        |
| 210 nm                         | 1160 $\pm$ 92   | 437 $\pm$ 46                | 497 $\pm$ 57                   | 501 $\pm$ 33                      | 500 $\pm$ 84                    | 484 $\pm$ 44        |
| Fluorescence detection         |                 |                             |                                |                                   |                                 |                     |
| Tyrosine-like (220/310 nm)     | 859 $\pm$ 164   | 413 $\pm$ 51                | 455 $\pm$ 36                   | 445 $\pm$ 59                      | 526 $\pm$ 79                    | 501 $\pm$ 55        |
| Tryptophan-like (270/355 nm)   | 790 $\pm$ 60    | 392 $\pm$ 33                | 444 $\pm$ 20                   | 446 $\pm$ 16                      | 519 $\pm$ 50                    | 520 $\pm$ 45        |
| Humic/fulvic-like (330/425 nm) | 818 $\pm$ 46    | 397 $\pm$ 43                | 448 $\pm$ 22                   | 459 $\pm$ 26                      | 536 $\pm$ 40                    | 571 $\pm$ 41        |
| Humic/fulvic-like (390/500 nm) | 944 $\pm$ 60    | 451 $\pm$ 55                | 529 $\pm$ 27                   | 540 $\pm$ 30                      | 630 $\pm$ 51                    | 656 $\pm$ 44        |

**Table S6c.** Dispersities DWTP B (mean  $\pm$  SD,  $n = 4$ ).

|                                | B1<br>Raw water | B2<br>Flotation<br>effluent | B3<br>Chlorination<br>effluent | B4<br>Sand filtration<br>effluent | B5<br>AC filtration<br>effluent | B6<br>Treated water |
|--------------------------------|-----------------|-----------------------------|--------------------------------|-----------------------------------|---------------------------------|---------------------|
| UV detection                   |                 |                             |                                |                                   |                                 |                     |
| 254 nm                         | 1.78 $\pm$ 0.25 | 1.58 $\pm$ 0.36             | 1.59 $\pm$ 0.24                | 1.60 $\pm$ 0.14                   | 1.57 $\pm$ 0.23                 | 1.54 $\pm$ 0.05     |
| 210 nm                         | 1.96 $\pm$ 0.15 | 1.36 $\pm$ 0.12             | 1.46 $\pm$ 0.11                | 1.48 $\pm$ 0.06                   | 1.50 $\pm$ 0.17                 | 1.45 $\pm$ 0.05     |
| Fluorescence detection         |                 |                             |                                |                                   |                                 |                     |
| Tyrosine-like (220/310 nm)     | 1.94 $\pm$ 0.34 | 1.39 $\pm$ 0.11             | 1.45 $\pm$ 0.05                | 1.46 $\pm$ 0.05                   | 1.55 $\pm$ 0.21                 | 1.51 $\pm$ 0.11     |
| Tryptophan-like (270/355 nm)   | 1.72 $\pm$ 0.14 | 1.34 $\pm$ 0.05             | 1.43 $\pm$ 0.02                | 1.43 $\pm$ 0.02                   | 1.46 $\pm$ 0.04                 | 1.46 $\pm$ 0.04     |
| Humic/fulvic-like (330/425 nm) | 1.62 $\pm$ 0.09 | 1.31 $\pm$ 0.05             | 1.40 $\pm$ 0.03                | 1.41 $\pm$ 0.03                   | 1.41 $\pm$ 0.04                 | 1.44 $\pm$ 0.04     |
| Humic/fulvic-like (390/500 nm) | 1.61 $\pm$ 0.11 | 1.36 $\pm$ 0.06             | 1.47 $\pm$ 0.05                | 1.47 $\pm$ 0.03                   | 1.45 $\pm$ 0.07                 | 1.46 $\pm$ 0.04     |
